# Supplementary material for: Facile synthesis of mesoporous NixCo9−xS8 hollow spheres for high-performance supercapacitors and aqueous Ni/Co–Zn batteries
Source: Royal Society of Chemistry journal article supplement (doi:10.1039/d2ra03022e), 2022-01-01
Supplement: d2ra03022e1.pdf [file d2ra03022e1.pdf]

## Supporting Information

### **Facile synthesis of mesoporous Ni<sub>x</sub>Co<sub>9-x</sub>S<sub>8</sub> hollow spheres for high-performance supercapacitor and aqueous Ni/Co-Zn battery**

Daojun Zhang,<sup>a\*</sup> Jingchao Zhang,<sup>a</sup> Jiaqi Li,<sup>a</sup> Chenxiang Li,<sup>a</sup> Yuting Li,<sup>a</sup> Yingying Liu,<sup>a</sup>

Renchun Zhang<sup>a</sup>

<sup>a</sup> College of Chemistry and Chemical Engineering, Anyang Normal University, Anyang 455000, Henan, China

\* Corresponding author. Tel.: +86 372 2900040.

E-mail: zhangdj0410@126.com, zhangdj0410@sohu.com

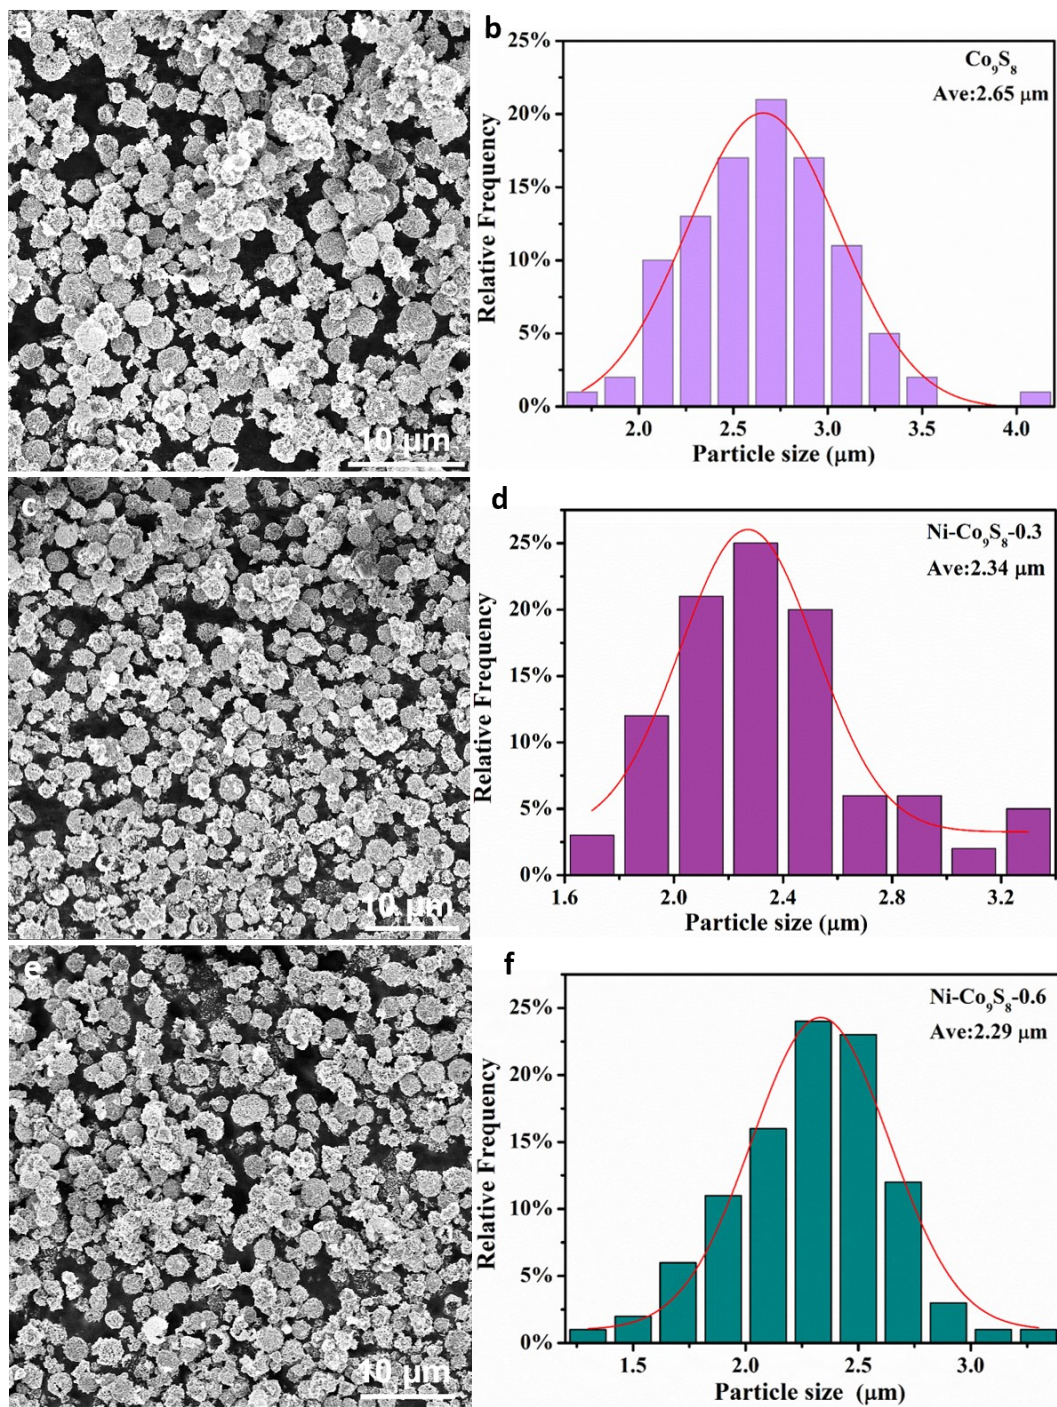

Fig.S1 The SEM images and size distribution of (a-b)  $\text{Co}_9\text{S}_8$ , (c-d)  $\text{Ni-Co}_9\text{S}_8-0.3$ , and (e-f)  $\text{Ni-Co}_9\text{S}_8-0.6$  hollow spheres.

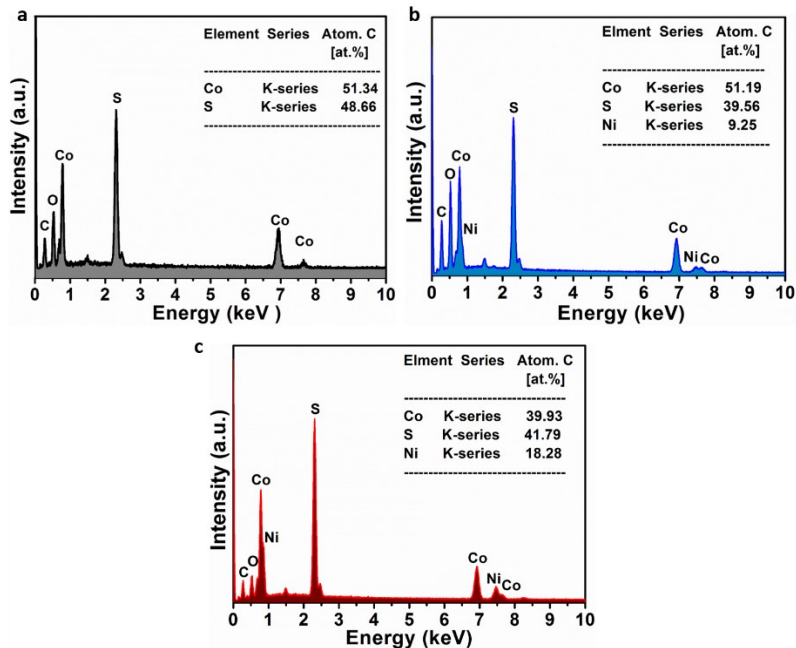

Fig.S2 EDS of (a)  $\text{Co}_9\text{S}_8$ , (b)  $\text{Ni-Co}_9\text{S}_8\text{-0.3}$ , and (c)  $\text{Ni-Co}_9\text{S}_8\text{-0.6}$  hollow spheres.

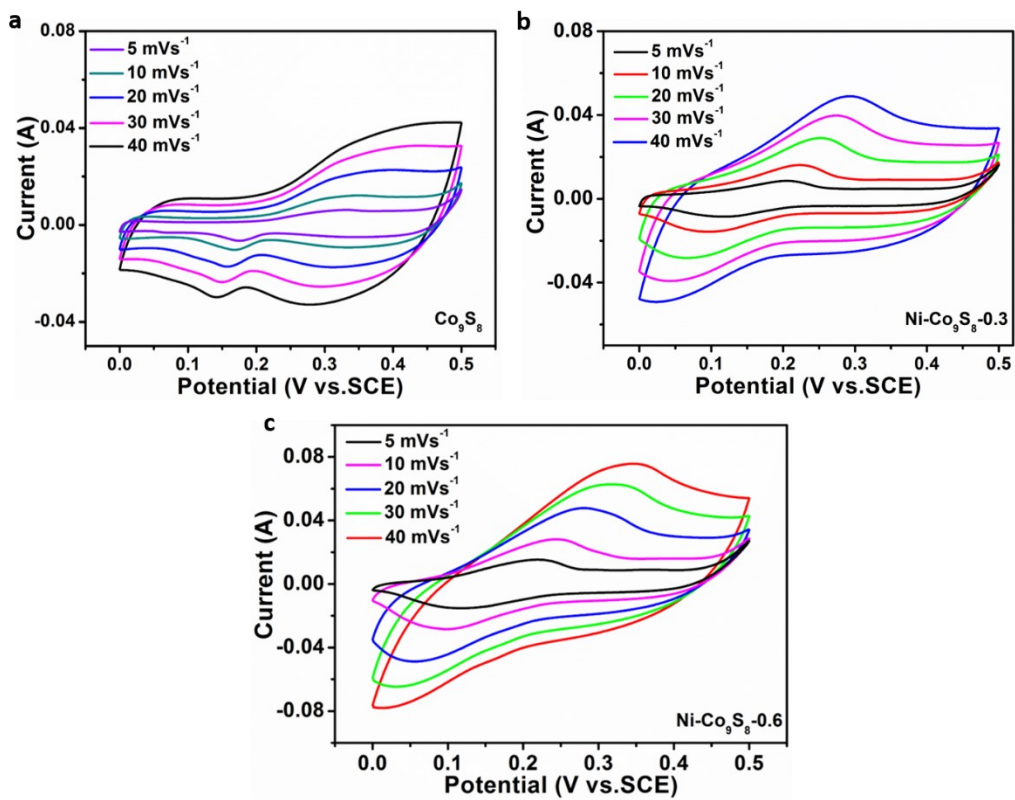

Fig.S3 CV curves of (a)  $\text{Co}_9\text{S}_8$ , (b)  $\text{Ni-Co}_9\text{S}_8\text{-0.3}$ , and (c)  $\text{Ni-Co}_9\text{S}_8\text{-0.6}$  hollow spheres.

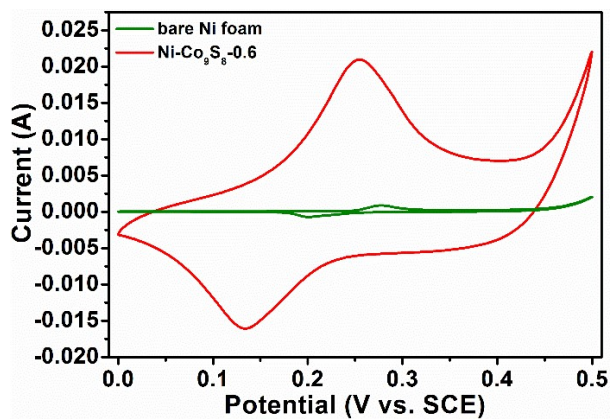

Fig.S4 The comparison of CV curves of bare Ni foam and Ni-Co<sub>9</sub>S<sub>8</sub>-0.6 hollow spheres at the scan rate of 5 mV s<sup>-1</sup>.

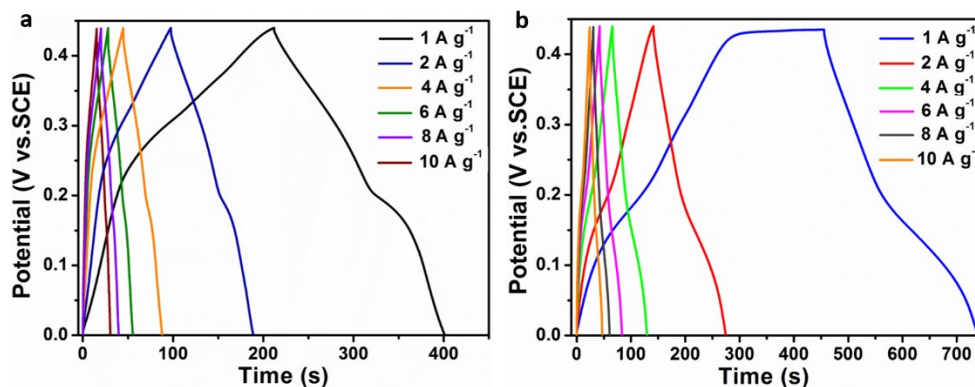

Fig.S5 GCD curves of (a) Co<sub>9</sub>S<sub>8</sub> and (b) Ni-Co<sub>9</sub>S<sub>8</sub>-0.3 electrodes.

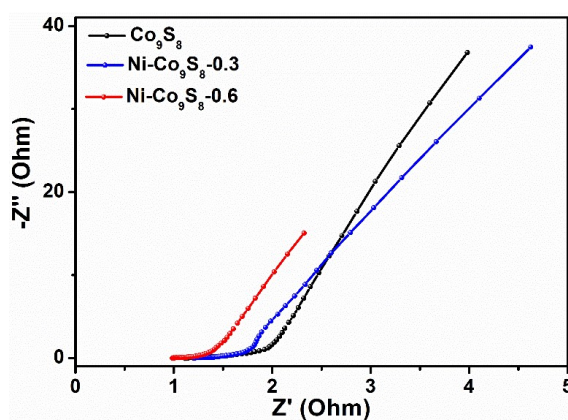

Fig.S6 The Nyquist plots of Co<sub>9</sub>S<sub>8</sub>, Ni-Co<sub>9</sub>S<sub>8</sub>-0.3, and Ni-Co<sub>9</sub>S<sub>8</sub>-0.6 hollow spheres.

Table S1 The peak area ratio of  $\text{Co}^{3+}/\text{Co}^{2+}$  and  $\text{Ni}^{3+}/\text{Ni}^{2+}$  in  $\text{Ni}_x\text{Co}_{9-x}\text{S}_8$  series microspheres.

| Sample                               | $\text{Co}^{3+}/\text{Co}^{2+}$ | $\text{Ni}^{3+}/\text{Ni}^{2+}$ |
|--------------------------------------|---------------------------------|---------------------------------|
| $\text{Co}_9\text{S}_8$              | 0.3248                          | 0                               |
| $\text{Ni-Co}_9\text{S}_8\text{-30}$ | 0.3127                          | 1.8803                          |
| $\text{Ni-Co}_9\text{S}_8\text{-60}$ | 0.3529                          | 2.3823                          |

Table S2 Comparison of the performance of the  $\text{Ni}_x\text{Co}_{9-x}\text{S}_8$  mesoporous hollow microspheres electrode with other reported Co-based and sulfides electrode.

| Materials                                | Morphology                               | Electrolyte (KOH) | Specific capacity ( $\text{F g}^{-1}$ )        | Rate capability                            | Capacity retention (%)                  | Ref                                        |
|------------------------------------------|------------------------------------------|-------------------|------------------------------------------------|--------------------------------------------|-----------------------------------------|--------------------------------------------|
| $\text{Co}_9\text{S}_8@\text{N-C@MoS}_2$ | core-shell structured nanocubes          | 3 M               | 410.0 ( $10 \text{ A g}^{-1}$ )                | 79.8% ( $0.5\text{-}10 \text{ A g}^{-1}$ ) | 101.7% ( $20000, 10 \text{ A g}^{-1}$ ) | ACS Appl. Energy Mater. 2018, 1, 3513–3520 |
| rGO/ $\text{Co}_9\text{S}_8$             | hollow particles                         | 1 M               | 575.9 ( $2 \text{ A g}^{-1}$ )                 | 77.7% ( $2\text{-}10 \text{ A g}^{-1}$ )   | 92% ( $9000, 4 \text{ A g}^{-1}$ )      | Chin. Chem. Lett. 2018, 29, 612–615        |
| NiCo-MOF NSHS                            | nanosheet-assembled hollow spheres       | 3 M               | 1126.7 ( $0.5 \text{ A g}^{-1}$ )              | 65% ( $0.5\text{-}10 \text{ A g}^{-1}$ )   | 93% ( $3000, 10 \text{ A g}^{-1}$ )     | Inorg. Chem. 2020, 59, 11385–11395         |
| $\text{Co}_9\text{S}_8\text{-X@CN}$      | octahedral nanoparticles / carbon matrix | 6 M               | 471.1 ( $0.5 \text{ A g}^{-1}$ )               | 59.0% ( $0.5\text{-}10 \text{ A g}^{-1}$ ) | 79.2% ( $1000, 10 \text{ A g}^{-1}$ )   | Chem Asian J. 2021, 16, 1-8                |
| $\text{Co}_9\text{S}_8/\text{GPs}$       | nanotube arrays / graphene paper         | 2 M               | 653 ( $0.5 \text{ A g}^{-1}$ )                 | 71.8% ( $0.5\text{-}10 \text{ A g}^{-1}$ ) | 91.8% ( $2500, 10 \text{ A g}^{-1}$ )   | Chem. Eur. J. 2018, 24, 2339–2343          |
| $\text{NiS@CoS}$                         | core-shell                               |                   | 1210 ( $1 \text{ A g}^{-1}$ )                  | 82% ( $1\text{-}10 \text{ A g}^{-1}$ )     | 80.94% ( $2000, 10 \text{ A g}^{-1}$ )  | Adv. Mater. Interfaces 2019, 7, 1901618    |
| $\text{Co}_9\text{S}_8@\text{C}$         | hollow microspheres                      | 1 M               | 514 ( $1 \text{ A g}^{-1}$ )                   | 77% ( $1\text{-}16 \text{ A g}^{-1}$ )     | 88% ( $1000, 8 \text{ A g}^{-1}$ )      | ChemElectro Chem, 2018, 2, 137-143         |
| P-CoS <sub>1.097-6</sub>                 | dandelion-like                           |                   | 536 $\text{C g}^{-1}$ ( $5 \text{ A g}^{-1}$ ) | 94% ( $5\text{-}20 \text{ A g}^{-1}$ )     | 97% ( $5000, 10 \text{ A g}^{-1}$ )     | J. Electroanal. Chem. 2021, 889, 115231    |

|                                            |                                      |     |                                         |                                       |                                             |                                                         |
|--------------------------------------------|--------------------------------------|-----|-----------------------------------------|---------------------------------------|---------------------------------------------|---------------------------------------------------------|
| CoS <sub>2</sub> HNs                       | nanocuboids                          | 3 M | 703.3 ± 0.5<br>(0.5 A g <sup>-1</sup> ) | 72.5% (0.5-<br>10 A g <sup>-1</sup> ) | ---                                         | J. Colloid<br>Interface Sci.<br>2021, 599,<br>577–585   |
| CoS <sub>x</sub> /C                        | Hierarchical<br>hollow<br>nanocages  | 1 M | 618<br>(2 A g <sup>-1</sup> )           | 83.6% (2-50<br>A g <sup>-1</sup> )    | ca.100%<br>(10000,<br>4 A g <sup>-1</sup> ) | RSC Adv.,<br>2019, 9, 11253                             |
| Co-S-P                                     | Nanoflowers                          | 6 M | 969.5<br>(1 A g <sup>-1</sup> )         | 79.9% (1-<br>20A g <sup>-1</sup> )    | 105%<br>(30 000, 10 A<br>g <sup>-1</sup> )  | ACS Sustain.<br>Chem. Eng.,<br>2019, 7, 11448<br>–11454 |
| Ni-Co <sub>9</sub> S <sub>8</sub> -<br>0.6 | Mesoporous<br>hollow<br>microspheres | 2 M | 1300<br>(1 A g <sup>-1</sup> )          | 80.6% (1-<br>10A g <sup>-1</sup> )    | 74.5% (5000<br>,<br>4 A g <sup>-1</sup> )   | This<br>work                                            |
